# Supplementary material
Source: PubMed Central journal article supplement (PMC3659803)
Supplement: NIHMS478275-supplement-01.pdf [file NIHMS478275-supplement-01.pdf]

SUPPLEMENTAL MATERIAL

**Supplemental Table A1: Adjusted Predictors of Death  
in CRT-D and Standard ICD Patients**

|                           | Early<br>HR (95% CI) | Late<br>HR (95% CI) |
|---------------------------|----------------------|---------------------|
| CRT v. Standard ICD       |                      |                     |
| LBBB                      | 0.82 (0.73-0.91)     | 0.89 (0.83-0.95)    |
| IVCD                      | 0.93 (0.80-1.07)     | 0.90 (0.83-0.97)    |
| RBBB                      | 0.92 (0.76-1.11)     | 1.01 (0.91-1.13)    |
| <i>p-value (BBB)</i>      | 0.007                | 0.003               |
| <i>p-value (CRT)</i>      | <0.001               | <0.001              |
| <i>p-value (BBB*CRT)*</i> | 0.272                | 0.043               |
| Age                       |                      |                     |
| Age 50-59                 | 1.00                 | 1.00                |
| Age 60-69                 | 0.93 (0.77-1.12)     | 0.92 (0.83-1.03)    |
| Age 70-79                 | 1.12 (0.94-1.34)     | 1.22 (1.10-1.36)    |
| Age 80+                   | 1.69 (1.40-2.03)     | 1.85 (1.66-2.06)    |
| <i>p-value</i>            | <0.001               | <0.001              |
| Gender (Female)           | 0.99 (0.90-1.08)     | 0.89 (0.84-0.94)    |
| <i>p-value</i>            | 0.738                | <0.001              |
| QRS Duration              |                      |                     |
| 120-149 ms                | 1.00                 | 1.00                |
| ≥ 150 ms                  | 0.81 (0.76-0.88)     | 0.89 (0.85-0.93)    |
| <i>p-value</i>            | <0.001               | <0.001              |
| Cardiomyopathy Etiology   |                      |                     |
| Nonischemic               | 1.00                 | 1.00                |
| Ischemic                  | 1.38 (1.24-1.54)     | 1.44 (1.35-1.53)    |
| <i>p-value</i>            | <0.001               | <0.001              |
| NYHA HF Class             |                      |                     |
| Class I                   | 1.00                 | 1.00                |
| Class II                  | 1.04 (0.83-1.30)     | 1.01 (0.90-1.14)    |
| Class III                 | 1.66 (1.34-2.06)     | 1.40 (1.25-1.57)    |
| Class IV                  | 2.90 (2.31-3.65)     | 1.99 (1.75-2.25)    |
| <i>p-value</i>            | <0.001               | <0.001              |
| Diabetes Mellitus         | 1.33 (1.24-1.44)     | 1.36 (1.30-1.42)    |
| <i>p-value</i>            | <0.001               | <0.001              |
| Atrial Fibrillation       | 1.27 (1.17-1.38)     | 1.22 (1.16-1.28)    |
| <i>p-value</i>            | <0.001               | <0.001              |
| Ventricular Tachycardia   | 1.16 (1.07-1.27)     | 1.12 (1.07-1.18)    |
| <i>p-value</i>            | <0.001               | <0.001              |
| Prior CABG                | 0.98 (0.91-1.07)     | 1.04 (0.99-1.08)    |
| <i>p-value</i>            | 0.687                | 0.154               |
| Cigarette Smoker Status   |                      |                     |
| Never                     | 1.00                 | 1.00                |

|                      |                     |                     |
|----------------------|---------------------|---------------------|
| Former               | 1.10 (1.01-1.19)    | 1.14 (1.09-1.19)    |
| Current              | 1.07 (0.93-1.22)    | 1.28 (1.18-1.38)    |
| <i>p-value</i>       | 0.073               | <0.001              |
| LVEF (%)             | 0.97 (0.97-0.98)    | 0.98 (0.98-0.99)    |
| <i>p-value</i>       | <0.001              | <0.001              |
| Systolic BP (mm Hg)  | 0.993 (0.991-0.995) | 0.996 (0.995-0.997) |
| <i>p-value</i>       | <0.001              | <0.001              |
| Diastolic BP (mm Hg) | 0.992 (0.988-0.995) | 0.994 (0.992-0.996) |
| <i>p-value</i>       | <0.001              | <0.001              |
| Heart Rate (bpm)     | 1.003 (1.002-1.004) | 1.002 (1.002-1.003) |
| <i>p-value</i>       | <0.001              | <0.001              |
| Medications          |                     |                     |
| Beta Blocker         | 0.84 (0.77-0.91)    | 0.87 (0.83-0.91)    |
| <i>p-value</i>       | <0.001              | <0.001              |
| ACE Inhibitor or ARB | 0.65 (0.60-0.70)    | 0.75 (0.71-0.78)    |
| <i>p-value</i>       | <0.001              | <0.001              |
| Diuretic             | 1.21 (1.10-1.33)    | 1.26 (1.20-1.33)    |
| <i>p-value</i>       | <0.001              | <0.001              |
| Amiodarone           | 1.30 (1.18-1.43)    | 1.13 (1.07-1.20)    |
| <i>p-value</i>       | <0.001              | <0.001              |

\*RBBB referent to LBBB

**Supplemental Table A2: Adjusted Predictors of Composite Outcome  
in CRT-D and Standard ICD Patients**

|                           | Early<br>HR (95% CI) | Late<br>HR (95% CI) |
|---------------------------|----------------------|---------------------|
| CRT v. Standard ICD       |                      |                     |
| LBBB                      | 0.84 (0.78-0.91)     | 0.86 (0.82-0.91)    |
| IVCD                      | 0.91 (0.83-1.01)     | 0.90 (0.84-0.97)    |
| RBBB                      | 1.02 (0.89-1.16)     | 1.00 (0.91-1.10)    |
| <i>p-value (BBB)</i>      | 0.196                | 0.042               |
| <i>p-value (CRT)</i>      | <0.001               | <0.001              |
| <i>p-value (BBB*CRT)*</i> | 0.013                | 0.007               |
| Age                       |                      |                     |
| Age 50-59                 | 1.00                 | 1.00                |
| Age 60-69                 | 0.87 (0.77-0.98)     | 0.85 (0.78-0.92)    |
| Age 70-79                 | 0.95 (0.85-1.07)     | 1.01 (0.93-1.10)    |
| Age 80+                   | 1.27 (1.13-1.44)     | 1.39 (1.27-1.51)    |
| <i>p-value</i>            | <0.001               | <0.001              |
| Gender (Female)           | 1.15 (1.08-1.22)     | 1.01 (0.97-1.06)    |
| <i>p-value</i>            | <0.001               | 0.678               |
| QRS Duration              |                      |                     |
| 120-149 ms                | 1.00                 | 1.00                |
| ≥ 150 ms                  | 0.83 (0.79-0.88)     | 0.88 (0.85-0.91)    |
| <i>p-value</i>            | <0.001               | <0.001              |
| Cardiomyopathy Etiology   |                      |                     |
| Nonischemic               | 1.00                 | 1.00                |
| Ischemic                  | 1.25 (1.16-1.35)     | 1.29 (1.22-1.36)    |
| <i>p-value</i>            | <0.001               | <0.001              |
| NYHA HF Class             |                      |                     |
| Class I                   | 1.00                 | 1.00                |
| Class II                  | 1.08 (0.92-1.25)     | 1.05 (0.96-1.16)    |
| Class III                 | 1.66 (1.44-1.93)     | 1.43 (1.30-1.57)    |
| Class IV                  | 2.49 (2.13-2.92)     | 1.95 (1.76-2.17)    |
| <i>p-value</i>            | <0.001               | <0.001              |
| Diabetes Mellitus         | 1.36 (1.29-1.43)     | 1.38 (1.33-1.43)    |
| <i>p-value</i>            | <0.001               | <0.001              |
| Atrial Fibrillation       | 1.27 (1.19-1.34)     | 1.21 (1.17-1.27)    |
| <i>p-value</i>            | <0.001               | <0.001              |
| Ventricular Tachycardia   | 1.16 (1.10-1.23)     | 1.11 (1.07-1.16)    |
| <i>p-value</i>            | <0.001               | <0.001              |
| Prior CABG                | 1.05 (0.99-1.11)     | 1.07 (1.03-1.12)    |
| <i>p-value</i>            | 0.123                | <0.001              |
| Cigarette Smoker Status   |                      |                     |
| Never                     | 1.00                 | 1.00                |

|                      |                     |                     |
|----------------------|---------------------|---------------------|
| Former               | 1.06 (1.00-1.11)    | 1.08 (1.04-1.12)    |
| Current              | 1.22 (1.11-1.33)    | 1.23 (1.15-1.31)    |
| <i>p-value</i>       | <0.001              | <0.001              |
| LVEF (%)             | 0.98 (0.97-0.98)    | 0.98 (0.98-0.99)    |
| <i>p-value</i>       | <0.001              | <0.001              |
| Systolic BP (mm Hg)  | 0.995 (0.994-0.997) | 0.997 (0.996-0.998) |
| <i>p-value</i>       | <0.001              | <0.001              |
| Diastolic BP (mm Hg) | 0.997 (0.995-0.999) | 0.997 (0.995-0.999) |
| <i>p-value</i>       | 0.014               | <0.001              |
| Heart Rate (bpm)     | 1.003 (1.002-1.004) | 1.002 (1.001-1.003) |
| <i>p-value</i>       | <0.001              | <0.001              |
| Medications          |                     |                     |
| Beta Blocker         | 0.89 (0.84-0.94)    | 0.89 (0.85-0.92)    |
| <i>p-value</i>       | <0.001              | <0.001              |
| ACE Inhibitor or ARB | 0.74 (0.70-0.78)    | 0.82 (0.79-0.85)    |
| <i>p-value</i>       | <0.001              | <0.001              |
| Diuretic             | 1.28 (1.20-1.37)    | 1.31 (1.25-1.37)    |
| <i>p-value</i>       | <0.001              | <0.001              |
| Amiodarone           | 1.26 (1.17-1.35)    | 1.20 (1.14-1.27)    |
| <i>p-value</i>       | <0.001              | <0.001              |

\*RBBB referent to LBBB
